# Supplementary material for: Bulged DNA substrates for identifying poxvirus resolvase inhibitors
Source: PubMed Central journal article supplement — Nucleic Acids Res. 2012 May 11;40(16):e124. doi: 10.1093/nar/gks325 (PMC3439875; doi:10.1093/nar/gks325), 2012-05-11
Supplement: supp_gks325_nar-00173-met-g-2012-File007.pdf [file supp_gks325_nar-00173-met-g-2012-File007.pdf]

## SUPPLEMENTAL INFORMATION

### Supplemental Data

#### Preparation of 1-hydroxy-1,8-naphthyridin-2(1H)-one derivatives.

The bromo naphthyridone intermediate was prepared using published procedures (Int. Patent WO 2008/010964 A1 (2008)) and as described in Figures S3 and S4. Commercially available boronic acids were purchased from Sigma Aldrich. Suzuki coupling reactions were used to prepare *N*-benzyloxynaphthyridone adducts. These were purified by silica gel flash chromatography. The resulting adducts were reduced with H<sub>2</sub>/10% Pd on carbon giving the resulting debenzylated naphthyridone compounds.

General Procedure for Suzuki Couplings: To a solution of the 6-bromonaphthyridone intermediate (0.171 mmol) in DMF (3 mL) was added a boronic acid (0.298 mmol), anhydrous K<sub>2</sub>CO<sub>3</sub> (54 mg, 0.436 mmol) and water (0.7 mL). The resulting solution was purged with a stream of argon for 10 min and then treated with Pd(dppf)Cl<sub>2</sub> (18 mg, 0.014 mmol) and heated in a sealed vial using *microwaves* at 110 °C for 20 min. Flash chromatography on silica gel eluting with a gradient of hexane/ethyl acetate (0 – 10% ethyl acetate in hexanes) gave pure adducts (20-30% yield).

General Procedure for Reduction of *N*-benzyloxynaphthyridones: A suspension of *N*-benzyloxynaphthyridone adducts (0.03 mmol), in EtOH/THF (50/50) (12 mL) was treated with 10% Pd /C (2 mg) and then hydrogenated at 1 atm overnight. The catalyst was removed by filtration through Celite and evaporated *in vacuo* giving pure products (80-100% yield).

Analytical Data:

**6-(Biphenyl-3-yl)-1,4-dihydroxy-3-phenyl-1,8-naphthyridin-2(1*H*)-one, Sodium salt (1).** <sup>1</sup>H NMR (300 MHz) (CD<sub>3</sub>OD) δ 8.86 (d, 1H, *J* = 2.6 Hz), 8.83 (d, 1H, *J* = 2.6 Hz), 7.96 (t, 1H, *J* = 1.65 Hz), 7.73-7.69 (m, 3H), 7.65-7.61 (m, 1H), 7.59-7.54 (m, 3H), 7.50-7.43 (m, 2H), 7.39-7.31 (m, 3H), 7.20-7.14 (m, 1H). MS: m/z (relative intensity) (ESI, negative ion) 405 (M-H, 100).

**1,4-Dihydroxy-3-phenyl-6-(4-(trifluoromethyl)phenethyl)-1,8-naphthyridin-2(1*H*)-one (2).** <sup>1</sup>H NMR (300 MHz) (CD<sub>3</sub>OD) δ 8.36 (s, 1H), 8.25 (s, 1H), 7.22-7.60 (m, 9H), 3.15-3.00 (m, 4H). MS: m/z (relative intensity) (ESI, negative ion) 425 (M-H, 100).

**(*E*)-1-(Benzyloxy)-4-hydroxy-3-phenyl-6-(4-(trifluoromethyl)styryl)-1,8-naphthyridin-2(1*H*)-one (3).** <sup>1</sup>H NMR (300 MHz) (CDCl<sub>3</sub>) δ 8.87 (d, 1H, *J* = 2.3 Hz), 8.46 (d, 1H, *J* = 2.3 Hz), 7.74-7.70 (m, 2H), 7.68-7.64 (m, 4H), 7.62-7.49 (m, 5H), 7.40-7.36 (m, 3H), 6.89-6.76 (m, 2H), 5.35 (s, 2H). MS: m/z (relative intensity) (ESI, negative ion) 513 (M-H, 100).

**1,4-Dihydroxy-6-(4-methoxyphenethyl)-3-phenyl-1,8-naphthyridin-2(1H)-one**

**(4).** <sup>1</sup>H NMR (300 MHz) (CD<sub>3</sub>OD) δ 8.35 (s, 1H), 8.25 (s, 1H), 3.74 (s, 3H), 3.06-2.91 (m, 4H). MS: m/z (relative intensity) (ESI, negative ion) 387 (M-H, 100).

**Ethyl 1,4-dihydroxy-2-oxo-6-(4-(trifluoromethyl)phenethyl)-1,2-dihydro-1,8-**

**naphthyridine-3-carboxylate (5).** <sup>1</sup>H NMR (300 MHz) (CD<sub>3</sub>OD) δ 8.50 (d, 1H, *J* = 1.7 Hz), 8.35 (d, 1H, *J* = 1.7 Hz), 7.55 (d, 1H, *J* = 8.1 Hz), 7.37 (d, 1H, *J* = 8.1 Hz), 4.47 (q, 2H, *J* = 7.2 Hz), 3.13-3.08 (m, 4H), 1.42 (t, 3H, *J* = 7.2 Hz). MS: m/z (relative intensity) (ESI, negative ion) 421 (M-H, 100).

**(E)-Ethyl 1-(benzyloxy)-4-hydroxy-2-oxo-6-(4-(trifluoromethyl)styryl)-1,2-**

**dihydro-1,8-naphthyridine-3-carboxylate (6).** <sup>1</sup>H NMR (300 MHz) (CDCl<sub>3</sub>) δ 8.90 (d, 1H, *J* = 2.3 Hz), 8.57 (d, 1H, *J* = 2.3 Hz), 7.75-7.69 (m, 2H), 7.68-7.62 (m, 4H), 7.43-7.35 (m, 3H), 7.27-7.21 (m, 3H), 5.30 (s, 2H), 4.56 (q, 2H, *J* = 7.1 Hz), 1.51 (t, 3H, *J* = 7.1 Hz). MS: m/z (relative intensity) (ESI, negative ion) 509 (M-H, 100).

**Ethyl 1,4-dihydroxy-6-(6-methoxypyridin-2-yl)-2-oxo-1,2-dihydro-1,8-**

**naphthyridine-3-carboxylate (7).** <sup>1</sup>H NMR (300 MHz) (CD<sub>3</sub>OD) δ 8.99 (s, 1H), 8.72 (s, 1H), 8.50 (s, 1H), 8.15-7.90 (m, 1H), 6.99-6.90 (m, 1H), 4.49 (q, 2H, *J* = 7.1 Hz), 3.97 (s, 3H), 1.43 (t, 3H). MS: m/z (relative intensity) (ESI, negative ion) 356 (M-H, 100).

**Ethyl 1-(benzyloxy)-4-hydroxy-6-(6-methoxypyridin-2-yl)-2-oxo-1,2-dihydro-1,8-naphthyridine-3-carboxylate (8).**  $^1\text{H}$  NMR (300 MHz) ( $\text{CDCl}_3$ )  $\delta$  8.95 (d, 1H,  $J = 2.3$  Hz), 8.55 (d, 1H,  $J = 2.3$  Hz), 8.44 (d, 1H,  $J = 2.1$  Hz), 7.83 (dd, 1H,  $J = 2.1$  Hz,  $J = 8.4$  Hz), 7.76-7.68 (m, 2H), 7.46-7.36 (m, 3H), 6.89 (d, 1H,  $J = 8.4$  Hz), 5.31 (s, 2H), 4.56 (q, 2H,  $J = 6.9$  Hz), 4.01 (s, 3H), 1.51 (t, 3H). MS:  $m/z$  (relative intensity) (ESI, negative ion) 446 (M-H, 100).

Figure S1

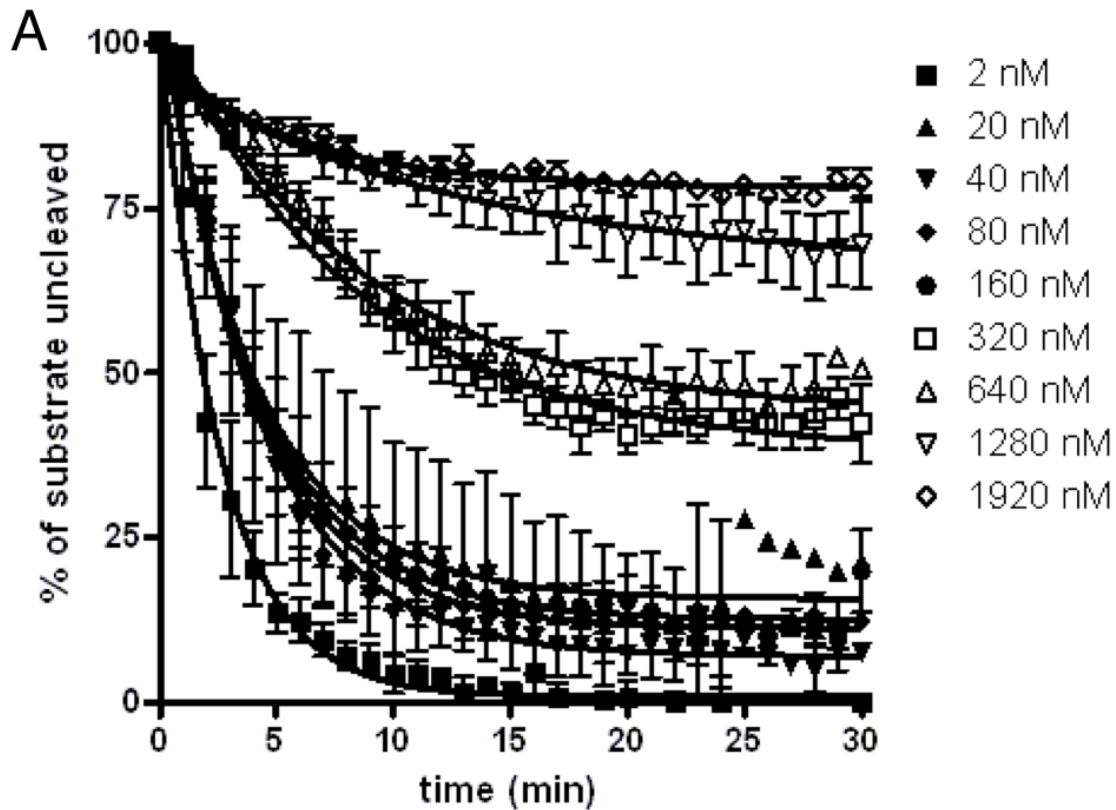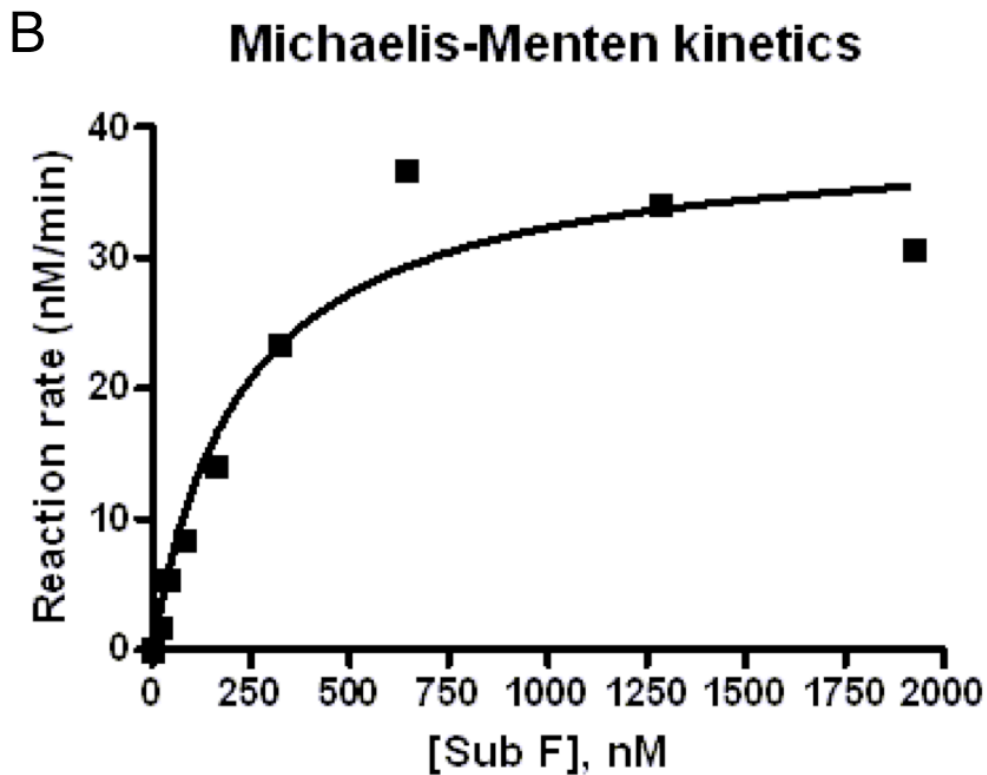

Figure S1. Michaelis-Menten analysis of cleavage by fowlpox resolvase. A) Fits to kinetic plots of reaction progression profiles at different concentrations of substrate. B) Plot of rates at different substrate concentrations.

Figure S2

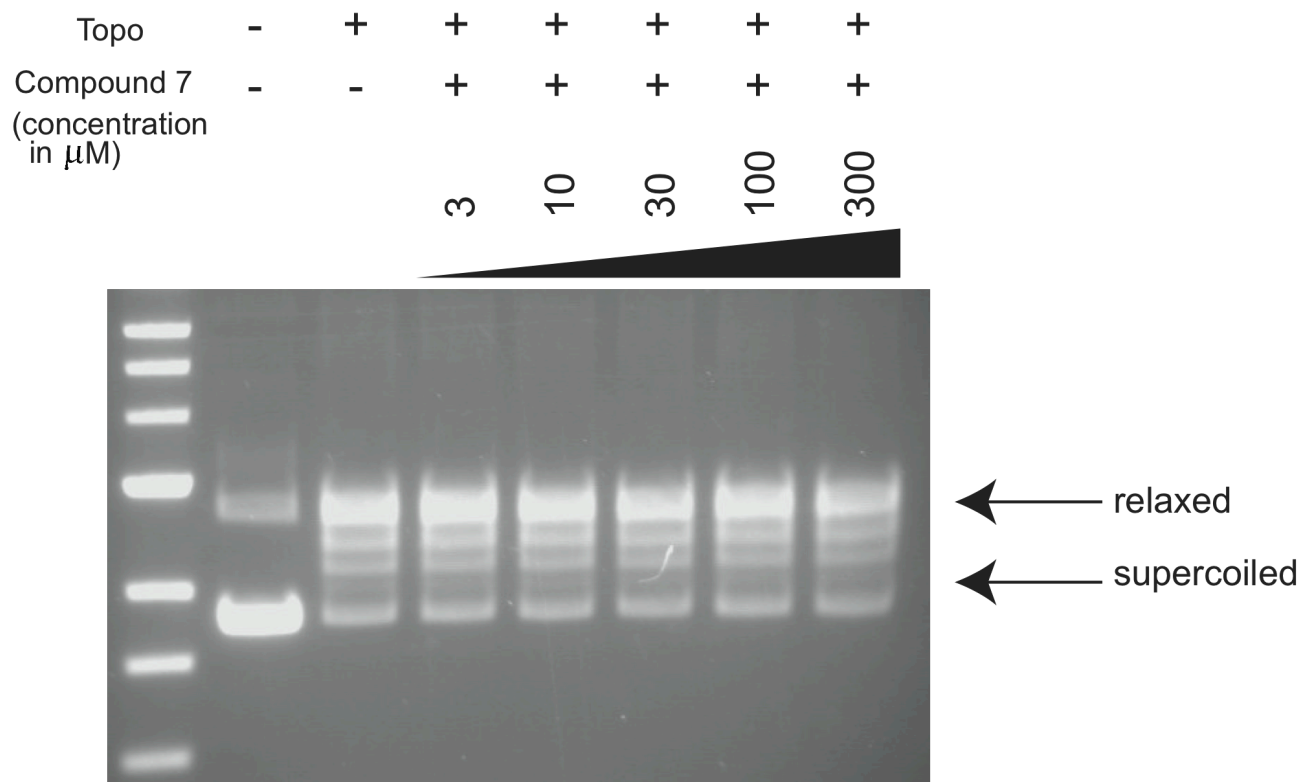

Figure S2. Lack of inhibition of variola topoisomerase activity by compound 7. Supercoiled DNA was exposed to purified variola topoisomerase in vitro. Products were then separated by electrophoresis on a native agarose gel and stained with ethidium bromide. The relaxation products (upper bands) were not reduced in intensity by the presence of compound 7. Methods were as described in Hwang et al., *J. Biol. Chem.* 281, 38052-38060 (2006).

Figure S3

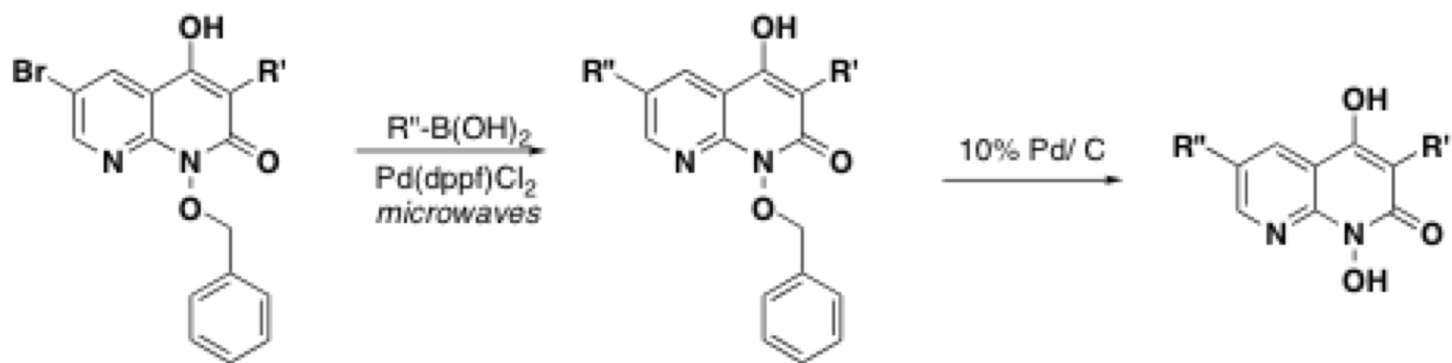

$\text{R}' = \text{phenyl, -CO}_2\text{Et}$

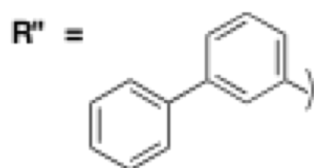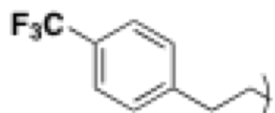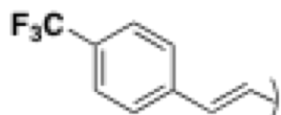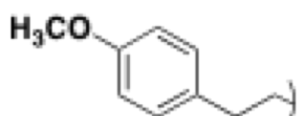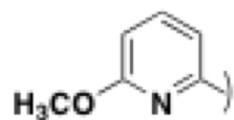

Figure S3. General synthetic scheme.

Figure S4

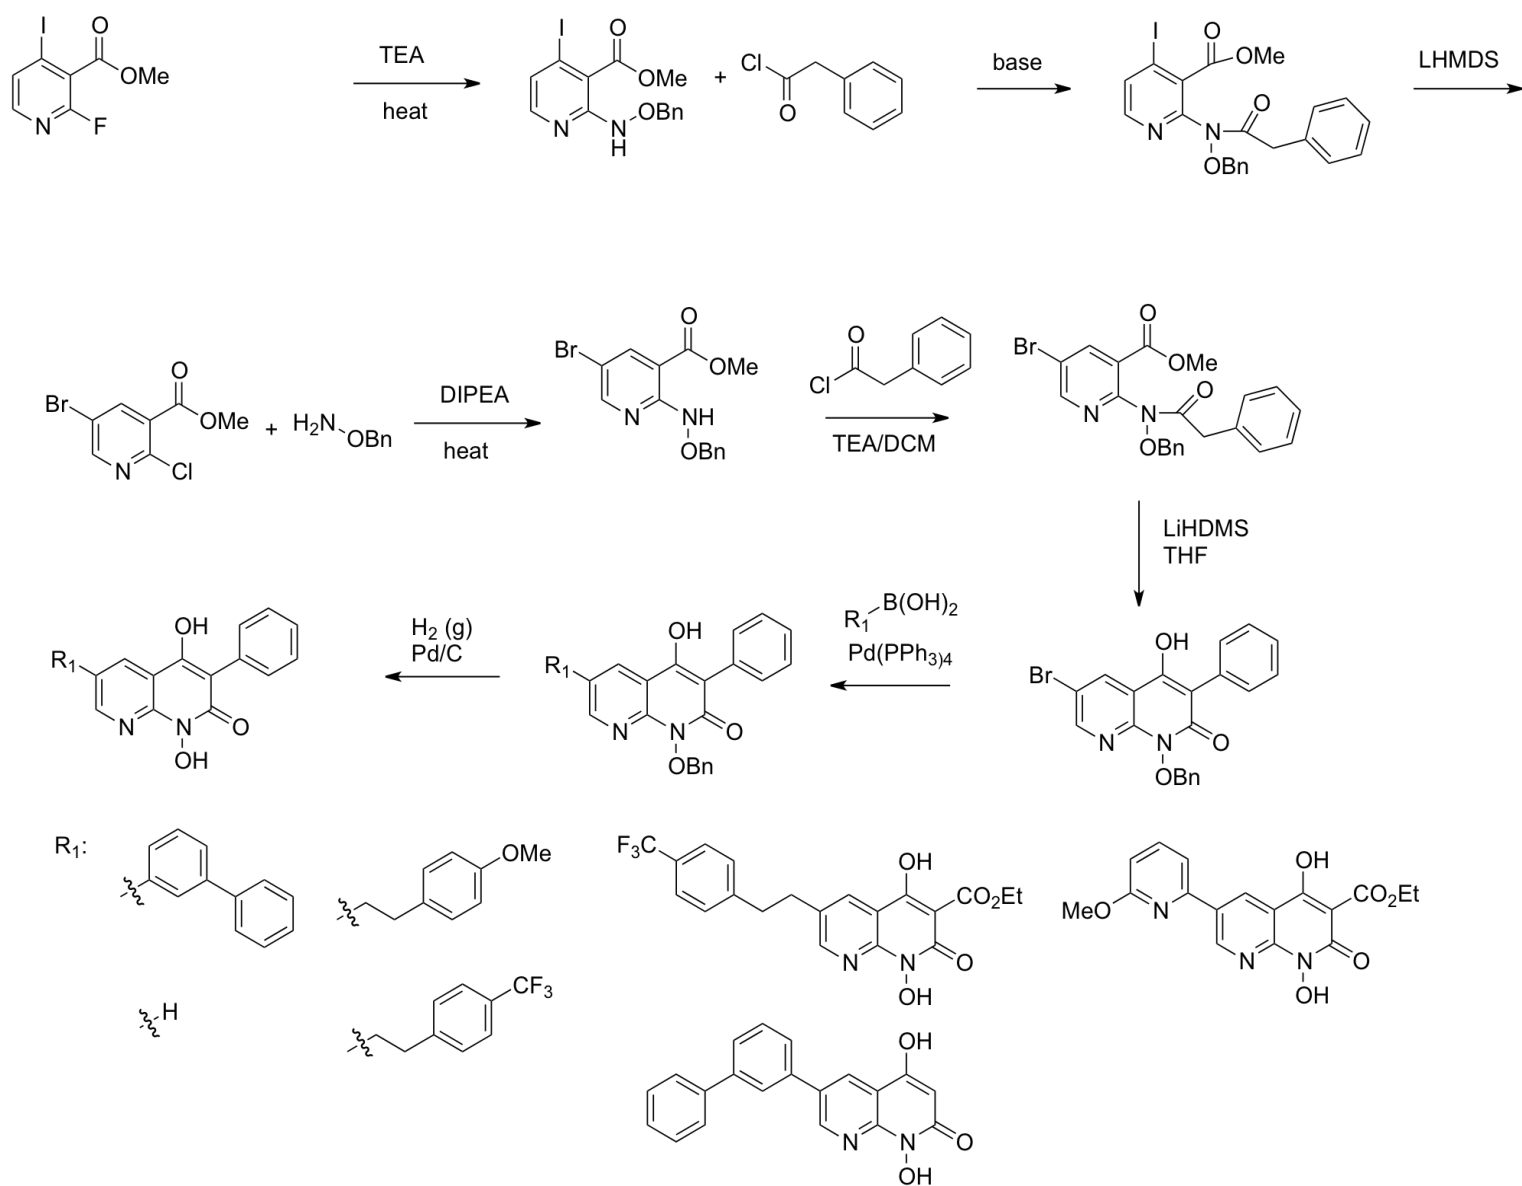

Figure S4. Scheme for synthesis of 1-hydroxy-1,8-naphthyridin-2(1H)-ones.



**Table S1 Oligonucleotides used for the assay substrates and size markers.**

| Substrate | Oligonucleotide sequence                                                                                                                                                                                   | use               |
|-----------|------------------------------------------------------------------------------------------------------------------------------------------------------------------------------------------------------------|-------------------|
| Sub A     | 5' -AGCTTCTGTGCAGCAGCTGCTCTCAACTGCAGTCTAGACT-3'<br>5' -AGTCTAGACTGCAGTTGAGAGCTTGCTAGGACGGATCCCT-3'<br>5' -AGGGATCCGTCCTAGCAAGCTTTTTGTTTTGATTGCGAGG-3'<br>5' -CCTCGCAATCAAAACAAAAGCAGCTGCTGCACAGAAGCT-3' -F | Holliday junction |
| Sub B     | 5' -CCTCGCAATCAAAACAAAAGCAGCTGCTGCACAGAAGCT-3'<br>F-5' -GTCGTGCTGCTTTTTGTTTTGATTGCGAGG-3'                                                                                                                  | sprayed duplex    |
| Sub C     | 5' -TCCTACCACCAGATACACGCCACAGTTTTTTTTTTGATTA-3' -F                                                                                                                                                         | single stranded   |
| Sub D     | F-5' -TCCTACCACCAGATACACGCCACAGTTTTTTTTTTGATTA-3'                                                                                                                                                          | single stranded   |
| Sub E     | 5' -TCCTACCACCAGATACACGCCACAGTTTTTTTTTTGATTA-3' -F<br>5' -TAATCAAAAAAAAAAACTGTGGCGTGTATCTGGTGGTAGGA-3'                                                                                                     | duplex            |
| Sub F     | 5' -TCCTACCACCAGATACACGCCACAGTTTTTTTTTTGATTA-3' -F<br>5' -TAATCTTTTTTTTTTCTGTGGCGTGTATCTGGTGGTAGGA-3'                                                                                                      | bulged substrate  |
| marker    | 5' -TCCTACCACCAGATACACGCCACAGTTTTTTTTTTGATTA-3' 5'<br>TTTTTTTTTTTTCTGTGGCGTGTATCTGGTGGTAGGA-3'                                                                                                             | 75 base           |
| marker    | 5' -TCCTACCACCAGATACACGCCACAGTTTTTTTTTTGATTA-3' 5'<br>CTGTGGCGTGTATCTGGTGGTAGGA-3'                                                                                                                         | 65 base           |
| marker    | 5' TTTTTTTTTTTGATTA-3' -F                                                                                                                                                                                  | 15 base           |
| marker    | 5' GAATA-3' -F                                                                                                                                                                                             | 5 base            |

**Table S2 results of high throughput screening using the off-center bulge substrate.**

| Library | Source      | Type of compounds | No. of molecules | Hit rate |
|---------|-------------|-------------------|------------------|----------|
| 1       | NSRB        | diverse           | 130,540          | 1.5%     |
| 2       | Merck & Co. | metal-chelating   | 2,787            | 45%      |
